# Supplementary material for: RNA language models predict mutations that improve RNA function
Source: PubMed Central journal article supplement (PMC11621547; doi:10.1038/s41467-024-54812-y), 2024-12-05

Top gel:

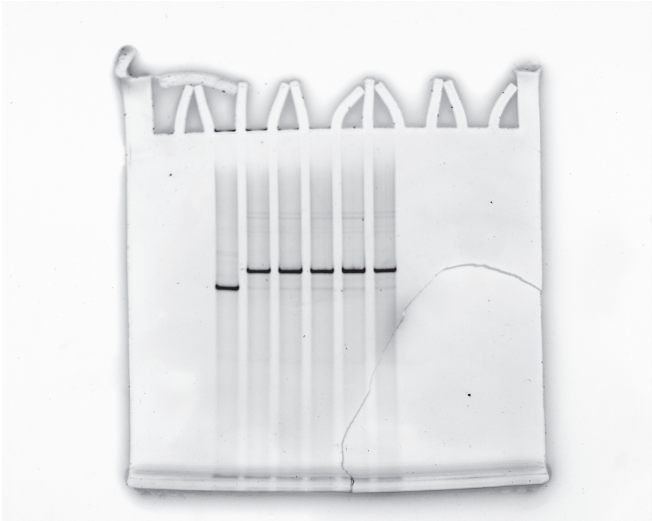

Bottom gel:

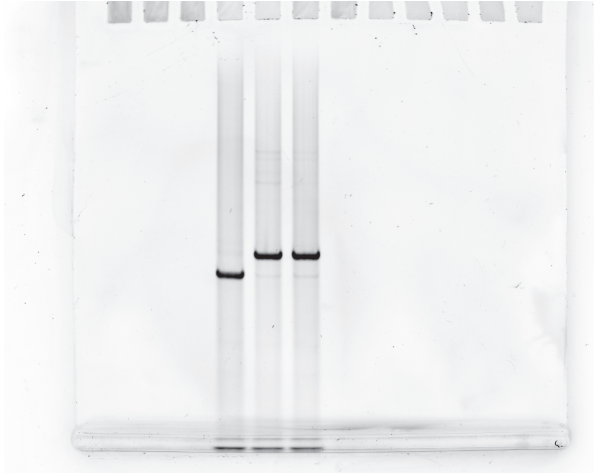

Supplement: 41467_2024_54812_MOESM12_ESM.pdf [file 41467_2024_54812_MOESM12_ESM.pdf]
